# Supplementary material for: The effect of block copolymer additives for a highly active polymeric metal-free oxygen reduction electrode
Source: Royal Society of Chemistry journal article supplement (doi:10.1039/c6ra00319b), 2016-01-01
Supplement: c6ra00319b1.pdf [file c6ra00319b1.pdf]

## Effect of block copolymer additives for highly active polymeric metal-free oxygen reduction electrode

Samuel R. Pering, James A. Nicholas, Bitu Bayatsarmadi, Drew Evans, Manrico Fabretto, Anton Blencowe, Peter J. Murphy, Pejman Talemi\*

### (Supporting information)

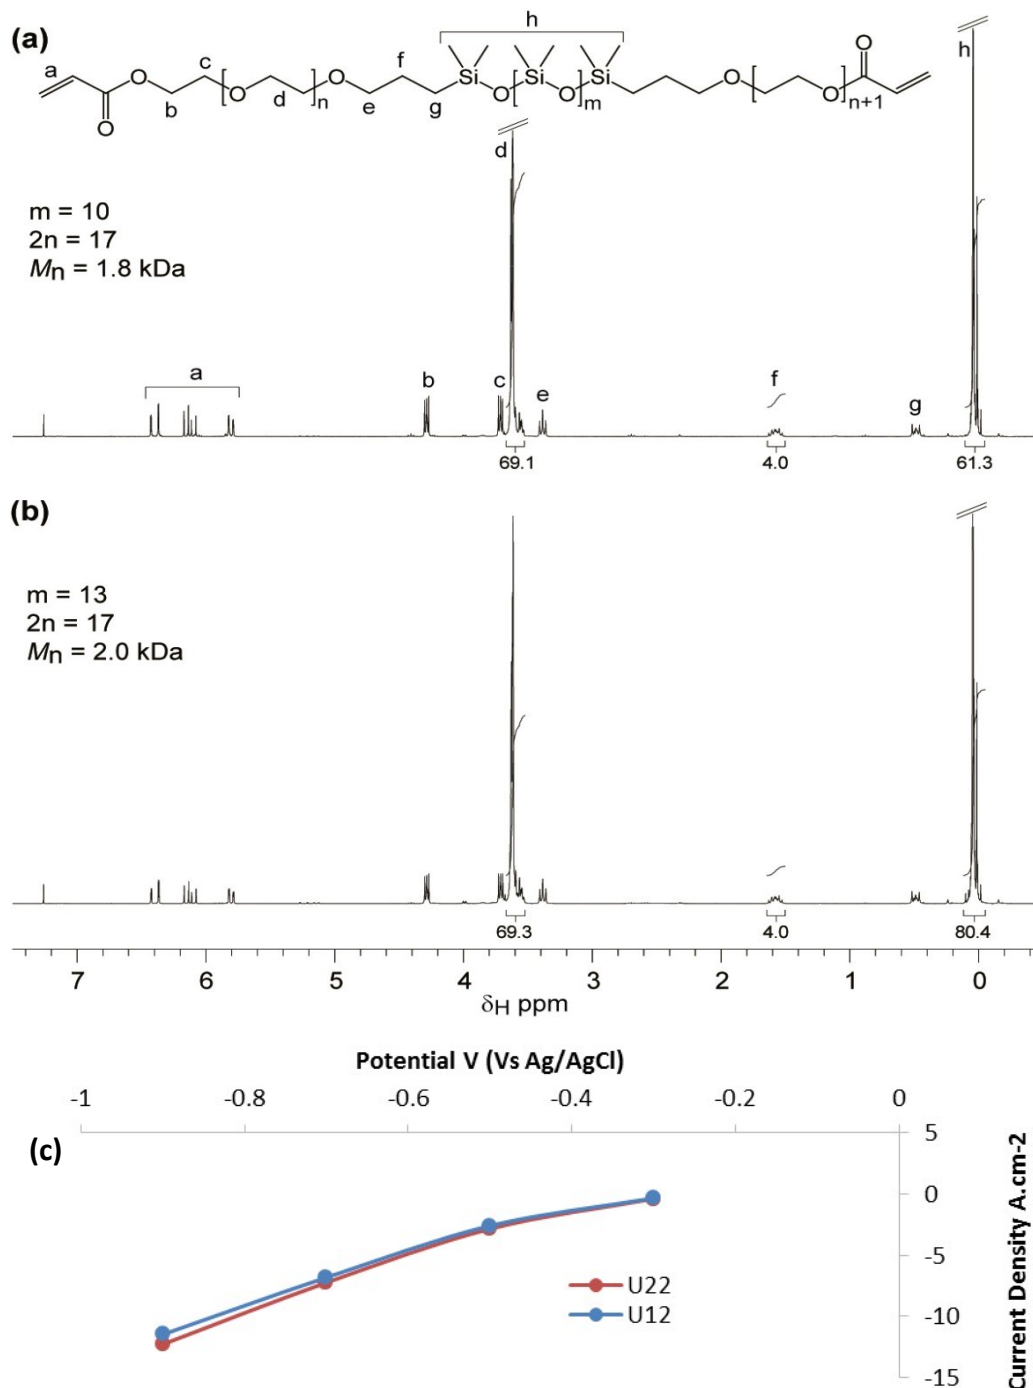

Figure S1.  $^1\text{H}$ NMR spectra of commercially available PEG-PDMS-PEG block copolymers supplied from Gelest under the product name of DBE-U12 (a) and DBE-U22 (b) and (c) the ORR performance of S-PEDOT samples based on these two copolymers.

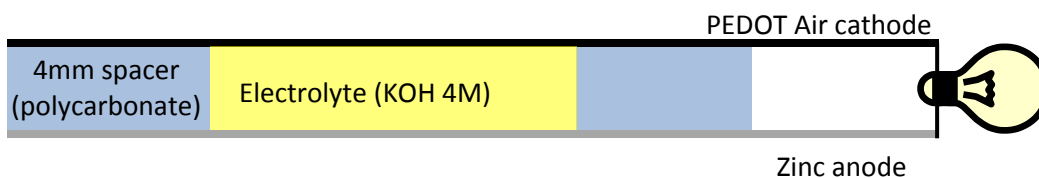

Figure S2. A schematic of the zinc air battery developed in this work.

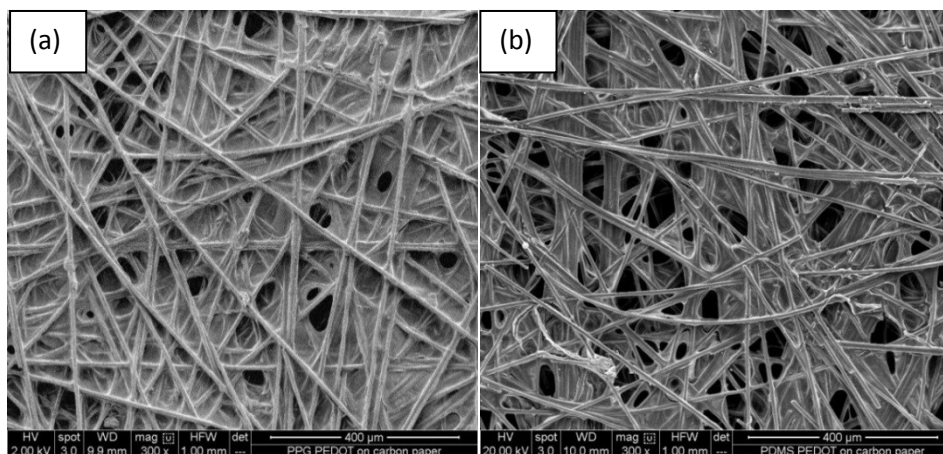

Figure S3. SEM images of (a) EPE-PEDOT and (b) S-PEDOT, both on carbon paper.

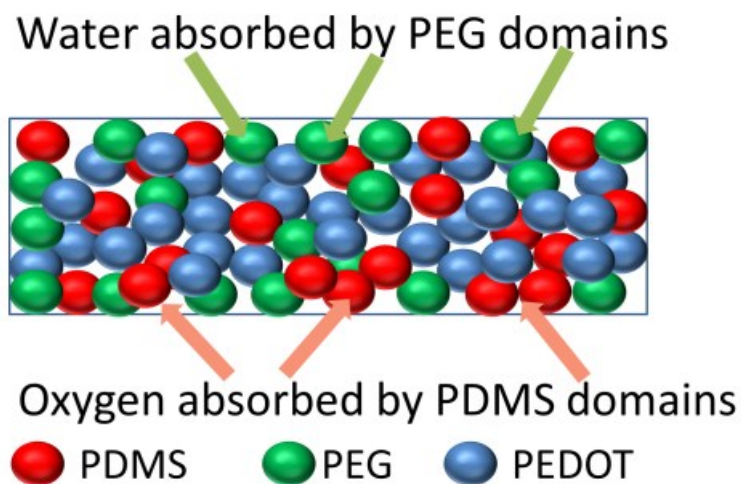

Figure S4. Electrocatalysis on PEDOT electrodes, assisted by oxygen and water absorption through PDMS and PEG domains, respectively.

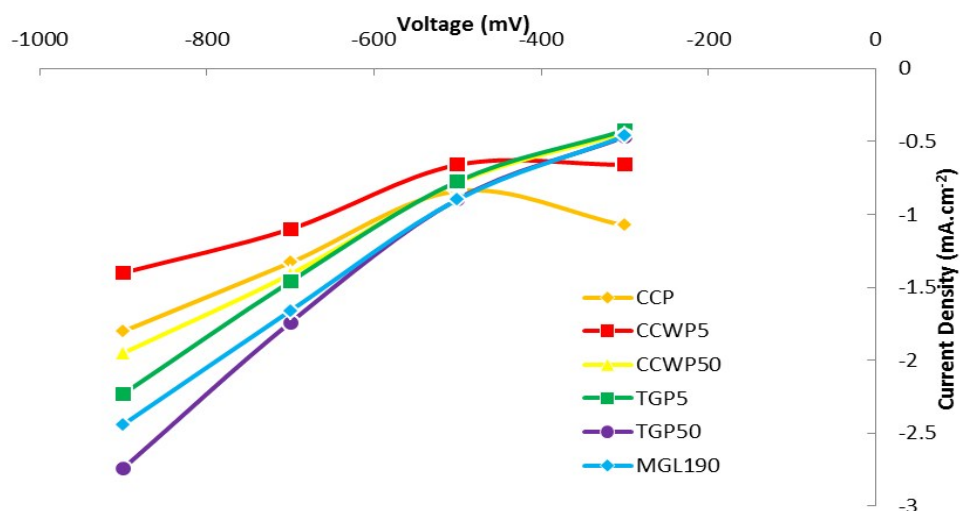

Figure S5. Current density versus voltage in pH 7 buffer solution for 4 layers of S-PEDOT on different carbon supports supplied from Fuel Cell Earth. (CCP: Carbon cloth plain; CCWP5: 5% wet proofed carbon cloth; CCWP50: 50% wet proofed carbon cloth; TGP5: 5% wet proofed carbon paper; TGP50: 50% wet proofed carbon paper; MGL190: activated carbon paper)

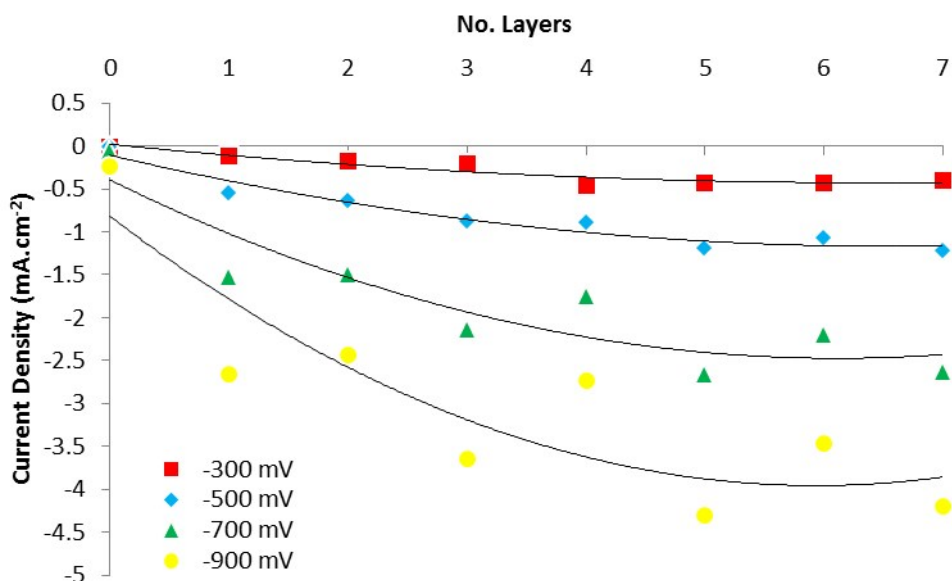

Figure S6. Conversion current density as a function of the number of layers (thickness) of S-PEDOT (pH 7).

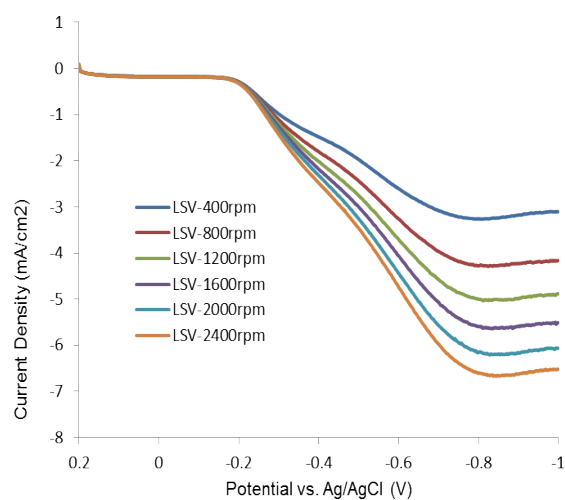

Figure S7. LSV of EPE-PEDOT film in O<sub>2</sub> saturated 0.1KOH at different rotation speed.

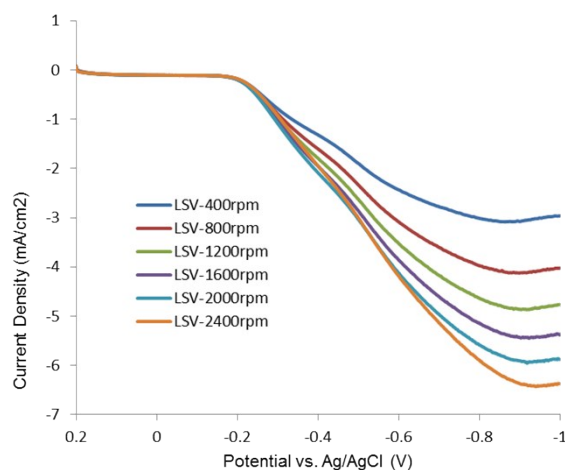

Figure S8. LSV of S-PEDOT film in O<sub>2</sub> saturated 0.1KOH at different rotation speed.

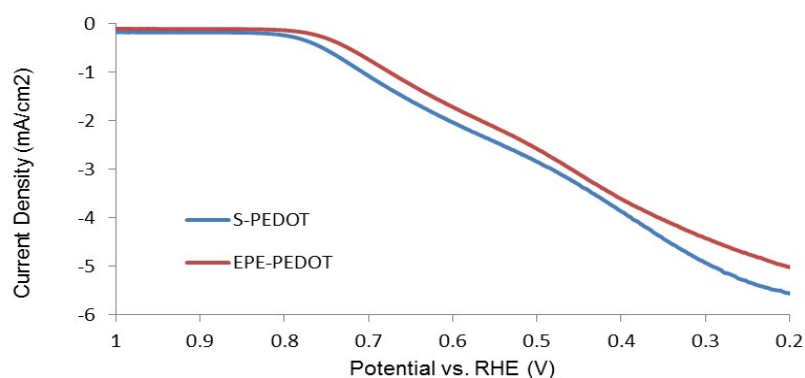

Figure S9. LSV of S-PEDOT and EPE-PEDOT at 1600 rpm indicating a lower over potential for S-PEDOT.

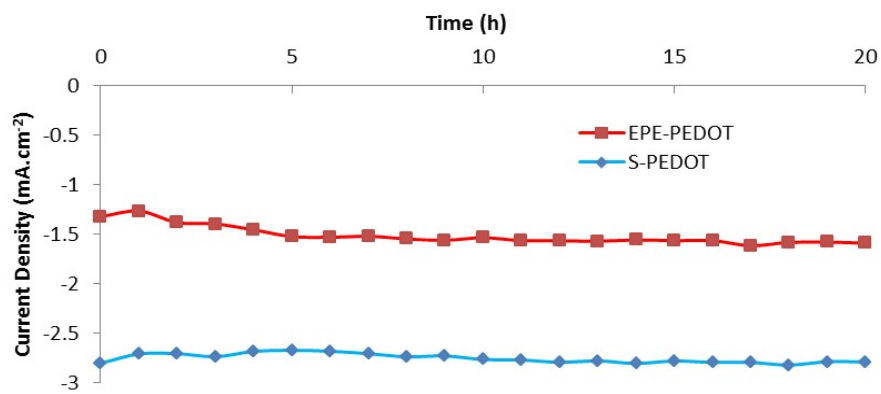

Figure S10. Current density versus time (at -0.5 V vs. Ag/AgCl) over 20 hours for S-PEDOT and EPE-PEDOT.
